# Supplementary material for: Continuous laminar evaporation: micron-scale distillationElectronic supplementary information (ESI) available: Figure S1. See http://www.rsc.org/suppdata/cc/b3/b311697b/
Source: Royal Society of Chemistry journal article supplement (doi:10.1039/b311697b), 2004-01-01
Supplement: b311697b.doc [file b311697b.doc]

Figure S1

Gas chromatographic analysis of feedstock solution and distillate after a single pass through the microdevice for: (a) crude, oxidised pyrrole and (b) a 20% solution of N,N-dimethylformamide in toluene.
